# Supplementary material for: High-Resolution Analysis of the 5′-End Transcriptome Using a Next Generation DNA Sequencer
Source: PLoS One. 2009 Jan 1;4(1):e4108. doi: 10.1371/journal.pone.0004108 (PMC2606021; doi:10.1371/journal.pone.0004108)
Supplement: Table S1 — Transcript profile in HT29 treated with 5Aza. (0.02 MB XLS) [file pone.0004108.s003.xls]

## Sheet: Sheet1
Table S1. Transcript profile in HT29 treated with 5Aza.
		Tag number / 6 million transcripts
Description	Refseq	Control	5Aza
ribosomal protein S9	NM_001013	94081.6	86090.3
ribosomal protein L13	NM_000977	78179.4	65206.9
ribosomal protein S3	NM_001005	59053.5	56047.5
heat shock 10kDa protein 1 (chaperonin 10)	NM_002157	56247.5	55424.7
ornithine decarboxylase antizyme 1	NM_004152	53125.1	74614.2
ribosomal protein L18	NM_000979	46958	50173
cytochrome c oxidase subunit VIb	NM_001863	43527.3	31069.6
ubiquinol-cytochrome c reductase hinge protein	NM_006004	35435.5	29905.2
ribosomal protein S14	NM_001025070	32208.5	31553.3
tubulin, alpha, ubiquitous	NM_006082	29116.5	26279.9
keratin 8	NM_002273	28090	31587.1
ubiquinol-cytochrome c reductase binding	NM_006294	27533.9	24326
candidate for split hand/foot malformation type	NM_006304	26759.5	22702.1
ribosomal protein L23	NM_000978	26514.1	21269.7
ribosomal protein S23	NM_001025	26323.9	38827.2
heterogeneous nuclear ribonucleoprotein A2/B1	NM_002137	24366.5	23748.3
ribosomal protein L24	NM_000986	24315.9	14659.7
proliferating cell nuclear antigen	NM_002592	23588.8	20967.9
calmodulin 2	NM_001743	22690.6	30515.2
transmembrane 4 superfamily member 4	NM_004617	22441.8	18311.5
ribosomal protein L13a	NM_012423	22074.9	17771.6
small nuclear ribonucleoprotein polypeptide F	NM_003095	21616.8	14831.9
selenoprotein H	NM_170746	20454	16207.2
upregulated during skeletal muscle growth 5	NM_032747	20320.1	17460.1
small EDRK-rich factor 2	NM_001018108	20264.9	19630.5
nucleolin	NM_005381	19939.6	20012.7
NADH dehydrogenase (ubiquinone) 1 beta	NM_005005	18145.5	18054.8
ribosomal protein S24 isoform c	NM_001026	17724.5	15381.5
ribosomal protein S4, X-linked X isoform	NM_001007	17136.9	18858.7
NADH dehydrogenase (ubiquinone) Fe-S protein 5,	NM_004552	16983.9	16022.1
Top 30 transcripts expressed in HT29 are listed. Each number of tags from 5’SOLiD was normalized to 6,000,000.
