# Supplementary material for: High-Resolution Analysis of the 5′-End Transcriptome Using a Next Generation DNA Sequencer
Source: PLoS One. 2009 Jan 1;4(1):e4108. doi: 10.1371/journal.pone.0004108 (PMC2606021; doi:10.1371/journal.pone.0004108)
Supplement: Table S5 — Cost- and time-benefit analysis of 5′SOLiD, 5′SAGE and SAGE (0.03 MB XLS) [file pone.0004108.s007.xls]

## Sheet: Sheet1
Table S5. Cost- and time-benefit analysis of 5'SOLiD, 5'SAGE and SAGE
					Factor Improvement over
	5'SOLiD	5'SAGE/dideoxy	PMAGE*	SAGE/dideoxy*	5'SAGE/dideoxy	SAGE/dideoxy
TSS identification	yes	yes	no	no	N/A	N/A
read length	25mer	20mer	14mer	14mer	1.3	1.9
Tags per dideoxy read	N/A	~20	N/A	~40	N/A	N/A
Price per dideoxy read	N/A	5	N/A	5	N/A	N/A
Tags per experiment **	~10,000,000	~100,000	~4,400,000	~100,000	N/A	N/A
Price per experiment	1125	25000	1770	12500	22.2222	11.1111
Price per tag	0.0001125	0.25	0.000386	0.125	2222.22	1111.11
Throughput
sequencing	6days	5days	N/A	4days	N/A	N/A
generation of construct	4days	10days	N/A	10days	2.5	2.5
presequencing step	N/A	10days	N/A	7days	N/A	N/A
Cost analyses reflected yields and sequencing expenditures, assuming roughly equivalent library construction costs among a single typical 5'SOLiD, 5'SAGE and SAGE experiment. *Current commercial cost was cited from reference 8 #Presequencing step shows library transformation, colony picking, template amplification, and template purification (steps not required in 5'SOLiD). 5'SOLiD expenditure is …
